# Supplementary material for: Mitofusin 2 plays a role in oocyte and follicle development, and is required to maintain ovarian follicular reserve during reproductive aging
Source: publisher site journal article supplement (doi:10.18632/aging.102024), 2019-06-16
Supplement: Supplementary file [file aging-v11i12-102024-supplementary-material-SD1.pdf]

SUPPLEMENTARY MATERIAL

Supplementary Figures

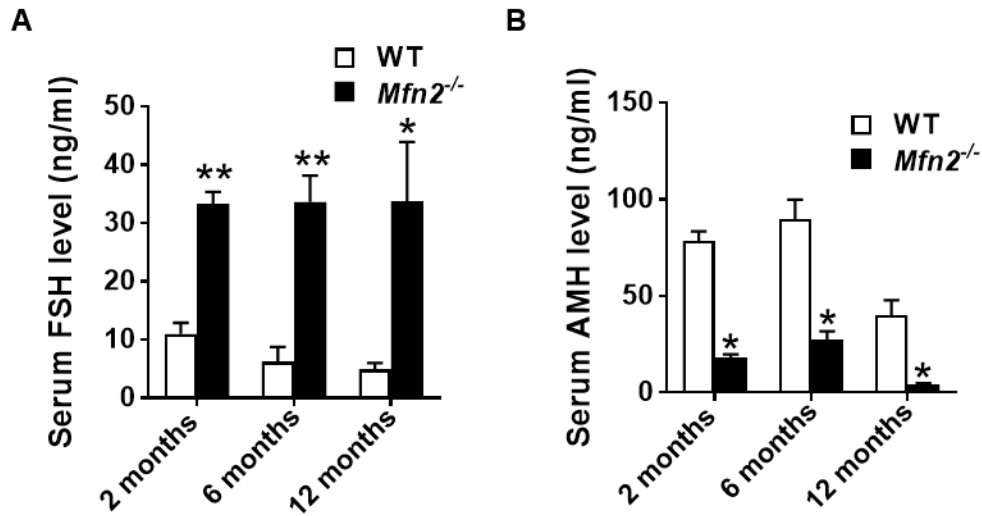

Supplementary Figure 1. Serum AMH and FSH levels in female *Mfn2*<sup>-/-</sup> mice. (A, B) Serum FSH and AMH levels in 2, 6- and 12 months old female WT and *Mfn2*<sup>-/-</sup> mice. Data presented as mean ± SEM. \**p* < 0.05, \*\**p* < 0.01 vs. WT from *t*-test.

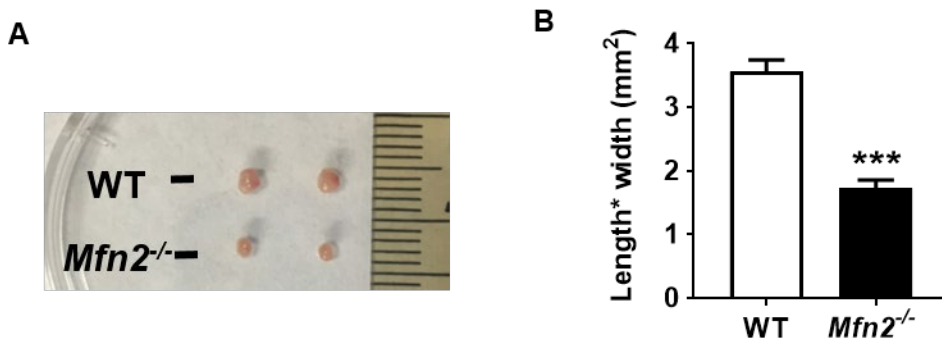

Supplementary Figure 2. Ovarian size is decreased in *Mfn2*<sup>-/-</sup> mice. (A) Representative photographs of ovaries from 8-week-old *Mfn2*<sup>-/-</sup> and WT mice. (B) *Mfn2*<sup>-/-</sup> mice had significantly smaller ovaries. Data presented as mean ± SEM. \*\*\**p* < 0.001 vs. WT from *t*-test.

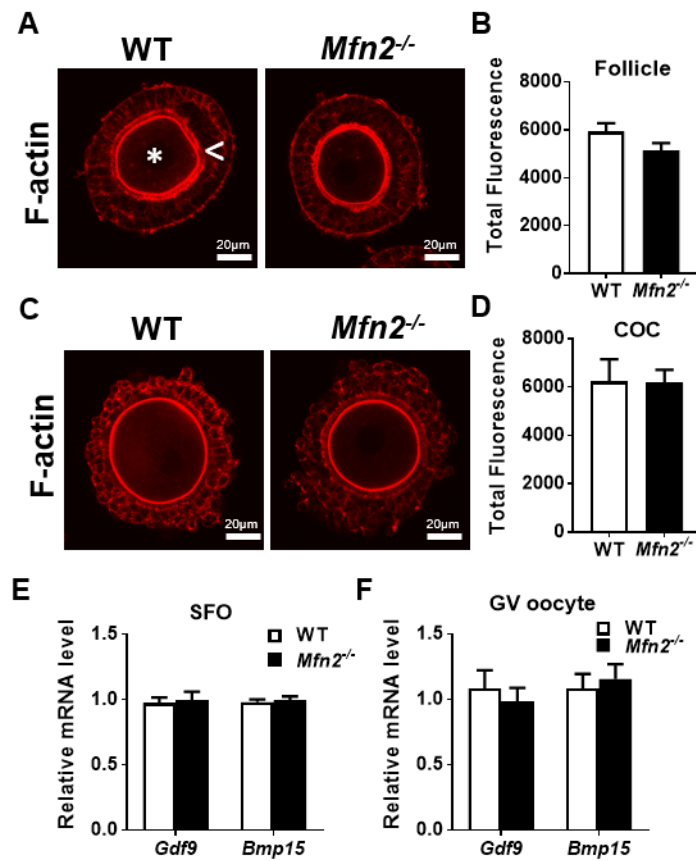

**Supplementary Figure 3. TZP formation is not changed in *Mfn2*<sup>-/-</sup> secondary follicles of COCs.** (A, C) Secondary follicles and COCs were isolated from the ovaries of *Mfn2*<sup>-/-</sup> and WT mice, fixed, labeled with rhodamine-phalloidin, and examined by confocal microscopy. Asterisk designates oocyte; open arrow designates labeling of TZPs. (B, D) The total peak intensity for the zona pellucida and plasma membrane was calculated. (E, F) qRT-PCR analysis of *Gdf9* and *Bmp15* expression in *Mfn2*<sup>-/-</sup> and WT SFOs and GV stage oocytes. Data presented as mean ± SEM.
