# Supplementary material for: Mitofusin 2 plays a role in oocyte and follicle development, and is required to maintain ovarian follicular reserve during reproductive aging
Source: publisher site journal article supplement (doi:10.18632/aging.102024), 2019-06-16
Supplement: Supplementary file [file aging-v11i12-102024-supplementary-material-SD2.pdf]

## Supplementary Table

**Table S1. The list of primers used for quantitative RT-PCR**

| Gene             | TaqMan assay number or Primer sequences (5' to 3'; F, forward; R, reverse)                                       |
|------------------|------------------------------------------------------------------------------------------------------------------|
| <i>β-actin</i>   | Mm00607939_s1                                                                                                    |
| <i>β-actin</i>   | F: GGCTGTATTCCCCTCCATCG<br>R: CCAGTTGGTAACAATGCCATGT                                                             |
| <i>Atp5a1</i>    | Mm00431960_m1                                                                                                    |
| <i>Bmp15</i>     | Mm00437797_m1                                                                                                    |
| <i>activin-β</i> | F: AGATCCCGCACCTCGAC<br>G: TGGTTGCCTTCATTAGAGACG                                                                 |
| <i>Cox1</i>      | Mm04225243_g1                                                                                                    |
| <i>Cox3</i>      | F: TTTGCAGGATTCTTCTGAGC<br>R: TGAGCTCATGTAATTGAAACACC                                                            |
| <i>Cre</i>       | F: ATGCTTCTGTCCGTTTGCC<br>R: CAACACCATTTTTCTGACCC                                                                |
| <i>Dnaja3</i>    | Mm00469723_m1                                                                                                    |
| <i>Gdf9</i>      | Mm00434083_m1                                                                                                    |
| <i>Hspd1</i>     | F: AGTGGATGACCTCGTGTTATGC<br>R: GGATCTAGTTTCTGGCCTCTTCG                                                          |
| <i>Hspe1</i>     | F: TGGTAATCTTTAGCGGTGCTC<br>R: GGAGGACTTTATCCCACAGC                                                              |
| <i>Mfn2 flox</i> | F: GAAGTAGGCAGTCTCCATCG<br>R: AACATCGCTCAGCCTGAACC                                                               |
| <i>Ndufv1</i>    | Mm00504941_m1                                                                                                    |
| <i>Sdhb</i>      | Mm00458272_m1                                                                                                    |
| <i>Uqcrc2</i>    | Mm00445961_m1                                                                                                    |
| Telomeric        | F: CGG TTT GTT TGG GTT TGG GTT TGG GTT TGG GTT TGG GTT<br>R: GGC TTG CCT TAC CCT TAC CCT TAC CCT TAC CCT TAC CCT |
| 36B4 control     | F: ACT GGT CTA GGA CCC GAG AAG<br>R: TCA ATG GTG CCT CTG GAG ATT                                                 |

Abbreviations: *Atp5a1*: ATP synthase, H<sup>+</sup> transporting, mitochondrial F1 complex, alpha subunit 1; *Bmp15*: bone morphogenetic protein 15; *Cox1*: cytochrome c oxidase subunit I; *Cox3*: cytochrome c oxidase subunit III; *Drp1*: Dynamin related protein 1; *Gdf9*: growth differentiation factor 9; *Mfn2*: mitofusin 1; *Ndufv1*: NADH dehydrogenase (ubiquinone) flavoprotein 1; *Opa1*: mitochondrial dynamin like GTPase; *Sdhb*: succinate dehydrogenase complex iron sulfur subunit B; *Uqcrc2*: ubiquinol cytochrome c reductase core protein 2.
